# Supplementary material for: Robust detection of translocations in lymphoma FFPE samples using targeted locus capture-based sequencing
Source: PubMed Central journal article supplement (PMC8184748; doi:10.1038/s41467-021-23695-8), 2021-06-07
Supplement: 41467_2021_23695_MOESM1_ESM.pdf [file 41467_2021_23695_MOESM1_ESM.pdf]

**Title:** Supplementary Data 1:

**Description:** Probe details used in this study.

**Title:** Supplementary Data 2:

**Description:** Overview of rearrangements identified by PLIER. Rearrangements that are additionally confirmed by identification of fusion-reads are bold faced and also marked by a star “\*”. Cells with “red” background indicate disagreement with FISH results. Cells with pink background indicate the calls that were denoted as “irrelevant” using butterfly plots. Cells with a yellow background refer to calls for which no FISH result was available. Calls with a blue font indicate calls for which no FISH experiment is done.

**Title:** Supplementary Data 3.

**Description:** Fusion-reads detected in this study.

**Title:** Supplementary Data 4:

**Description:** Capture-NGS translocation calls.
