# Supplementary material for: Robust detection of translocations in lymphoma FFPE samples using targeted locus capture-based sequencing
Source: PubMed Central journal article supplement (PMC8184748; doi:10.1038/s41467-021-23695-8), 2021-06-07
Supplement: 41467_2021_23695_MOESM2_ESM.pdf [file 41467_2021_23695_MOESM2_ESM.pdf]

# **Robust detection of translocations in lymphoma FFPE samples using Targeted Locus Capture-based sequencing**

## **Supplementary Methods**

### **Step-by-step FFPE-TLC protocol**

Deparaffinization buffer:

1x CutSmart buffer (Invitrogen) containing 0.02% Igepal

10x Ligation buffer:

660 mM Tris pH 7.5, 50 mM MgCl<sub>2</sub>, 50 mM DTT, 10 mM ATP

#### **Starting material**

Starting material of the FFPE-TLC procedure are single 2-10 µm coupes of regular diagnostic FFPE material, either as a scroll in a 1.5 ml Eppendorf tube or on a diagnostic microscope slide. Material from a slide should be scraped off and transferred to a 1.5 ml Eppendorf tube before starting.

#### **FFPE-TLC, Deparaffinization**

1. Add 800 µl Deparaffinization buffer to the Eppendorf tubes containing the FFPE material.
2. Heat the samples for 3 min at 80°C while shaking at 900 RPM.
3. Centrifuge 2 min, 10,000xg at 40°C.
4. Remove the paraffin layer using a pipet tip.
5. Repeat step 2-4 once.
6. Remove ~700 µl of the supernatant.
7. Add 6 µl 10% SDS.
8. Transfer the tissue with the buffer to a 130 µl Covaris Screw Cap microTUBE.
9. Sonicate the samples on a Covaris M220 for 300 seconds, Duty factor 20%, Power 75 Watts, 200 cycles/burst at 20°C.
10. Transfer the samples back to the same 1.5 ml Eppendorf tube.
11. Add 70 µl 1x CutSmart buffer.
12. Incubate 2 hours at 80°C while shaking at 900 RPM.
13. Add 30 µl 20% Triton X-100.
14. Incubate 30 minutes at 37°C while shaking at 900 RPM.

#### **FFPE-TLC, Digestion**

15. Add 100U NlaIII (New England Biolabs) and incubate 1 hour at 37°C while shaking at 900 RPM.
16. Inactivate NlaIII for 25 minutes at 65°C.

#### **FFPE-TLC, Ligation**

17. Cool the sample to RT.
18. To the 240 µl digested material, add 40 µl 10x Ligation buffer, 5 µl T4 DNA ligase and 115 µl deionized water.
19. Incubate 2 hours at RT while tumbling.

20. Add 40  $\mu$ l 5M NaCl, 8  $\mu$ l 10% SDS and 10  $\mu$ l Proteinase K (Roche) 10 mg/ml.
21. Incubate 1 hour at 56°C and 16 hours at 80°C.

#### **FFPE-TLC, Purification**

22. Add 5  $\mu$ l NucleoMag P-beads (Marcherey Nagel) and 453  $\mu$ l Isopropanol.
23. Incubate 30 minutes at RT while tumbling.
24. Place in magnetic rack until beads are separated.
25. Remove supernatant by decanting and add 800  $\mu$ l 80% Ethanol.
26. Remove tubes from magnet and resuspend the beads by shaking.
27. Repeat steps 24 and 25 once.
28. Remove remaining Ethanol using a pipet.
29. Air dry for 5 minutes.
30. Add 100  $\mu$ l 10 mM Tris pH 7.5 and place at 55°C for 5 minutes while shaking at 900 RPM.
31. Place in magnetic rack until beads are separated.
32. Transfer the supernatant containing the reshuffled DNA to a fresh tube.
33. Measure the DNA concentration using Qubit (Invitrogen)

#### **KAPA library prep, Fragmentation, end-repair and A-tailing**

This library prep step uses the KAPA hyper prep kit (Roche) cat.07962363001

34. Take 100 ng reshuffled FFPE DNA and fill to 50  $\mu$ l in a 50  $\mu$ l Covaris Screw Cap microTUBE.
35. Fragment the DNA on a Covaris M220 for 90 seconds, Duty factor 10%, Power 75 Watts, 200 cycles/burst at 20°C
36. Transfer the sonicated sample to a 200  $\mu$ l PCR tube
37. Make Master mix: (Kapa end repair & A tailing BUFFER) 7  $\mu$ l + (Kapa end repair & A tailing ENZYME MIX) 3  $\mu$ l.
38. To each 50  $\mu$ l fragmented sample Add 10  $\mu$ l of the master mix from former step.
39. Mix and incubate 30 minutes at 20°C and 30 minutes at 65°C, then hold at 8°C.
40. For adapter ligation, make a master mix of MilliQ 5  $\mu$ l, KAPA ligation buffer 30  $\mu$ l, KAPA DNA ligase 10  $\mu$ l.
41. Add 5  $\mu$ l KAPA dual indexed adapter (15  $\mu$ M) to the sample from step 36.
42. Now add 45  $\mu$ l ligation master mix (from step 7) to the sample from step 38.
43. Mix thoroughly and incubate at 20°C for 15 minutes.
44. Add 88  $\mu$ l Ampure XP beads.
45. Incubate 5 minutes.
46. Wash 2 times, on magnet, with 200  $\mu$ l 80% Ethanol.
47. Pipet as dry as possible, airdry for 5 minutes.
48. Elute in 53  $\mu$ l EB and transfer 50  $\mu$ l eluate to a fresh tube.

#### **KAPA library prep, Double sided size selection.**

49. Add 35  $\mu$ l Ampure XP to the 50  $\mu$ l.
50. Mix and incubate 5 minutes at RT to allow fragments larger than 450 bp to bind.
51. Place the samples on a magnet and incubate until the samples are clear.
52. Transfer 80  $\mu$ l of the supernatant to a new tube.
53. Add 10  $\mu$ l Ampure XP to the 80  $\mu$ l, mix and incubate 5 minutes.
54. Wash 2 times, on magnet, with 200  $\mu$ l 80% Ethanol.
55. Pipet as dry as possible
56. Air dry for 5 minutes
57. Elute in 23  $\mu$ l EB and transfer 20  $\mu$ l eluate to a fresh 200  $\mu$ l-tube

#### **KAPA library prep, Amplify the library.**

58. Prepare a PCR master mix (per reaction) KAPA HiFi HotStart mix 25  $\mu$ l and Library amplification Primer mix 5  $\mu$ l.
59. Add the 30  $\mu$ l PCR master mix to the 20  $\mu$ l eluate from step 57.
60. Run on a thermocycler: 1x (98°C 45 sec) **11x** (98°C 15 sec, 60°C 30 sec, 72°C 30 sec) 1x(72°C 1 min), hold at 4°C.

61. Add 90 µl Ampure XP beads to the 50 µl PCR mix (1.8x).
62. Incubate 5 minutes.
63. Wash 2 times, on magnet, with 200 µl 80% Ethanol.
64. Pipet as dry as possible.
65. Airdry for 5 minutes.
66. Elute in 30 µl EB.
67. Determine the DNA concentration with Qubit HS/2 µl.

#### **Hybrid Capture, hybridization**

The hybrid Capture step uses the Roche HyperCap Target Enrichment Kit cat. 8286345001 and the custom lymphoma SeqCap EZ probe pool described elsewhere in the supplementary data.

68. Mix equal amounts (by mass) 16 to max 18 of each of the amplified DNA sample libraries from step 66 to obtain a single pool with a combined mass of **2 µg**.
69. Add 5 µl COT human DNA (1 mg/ml).
70. Add 5 µl HyperCap Universal blocking oligos.
71. Determine the total volume, add 2 volumes Ampure XP and mix.
72. Incubate 10 minutes.
73. Wash 1 time, on magnet, with 190 µl 80% Ethanol.
74. Pipet as dry as possible, air dry for 5 minutes.
75. Prepare Hyb mix: 7,5 µl 2x hybridization buffer + 3 µl Hyb component A.
76. Elute, off magnet, in 10.5 µl Hyb mix, mix well, incubate 2 minutes and place back in magnet.
77. Transfer 10.5 µl to a tube containing 4.5 µl SeqCap probe pool.
78. Perform the hybridization incubation in a thermocycler using the following program with heated lid set to 10°C above block temperature: 95°C for 5 minutes, 47°C for 16 to 20 hours.

#### **Hybrid Capture, prepare capture beads and wash buffers**

79. Allow the Capture Beads to equilibrate to room temperature for 30 minutes.
80. Prepare buffers (for each wash/hyb).
81. Stringent wash buffer: 40 µl 10x stringent wash buffer + 360 µl milliQ.
82. Wash buffer I: 30 µl 10x wash buffer I + 270 µl milliQ.
83. Wash buffer II :20 µl 10x wash buffer II + 180 µl milliQ.
84. Wash buffer III :20 µl 10x wash buffer III + 180 µl milliQ.
85. Bead wash buffer: 100 µl 2.5x bead wash buffer + 150 µl milliQ.
86. Aliquot 50 µl of beads per capture into a 0.2 or 1.5 ml tube.
87. Place the tubes on a magnet. Allow the solution to clear.
88. Remove and discard the supernatant.
89. Add twice the initial volume of beads of 1X Bead Wash buffer.
90. Remove tubes from the magnetic particle collector and mix.
91. Place the tubes back on the magnet, once clear, remove and discard the liquid.
92. Repeat Steps 53 - 55 for a total of two washes.
93. After removing the buffer following the second wash, add 1X the initial volume of beads of 1X Bead Wash Buffer.
94. Remove tubes from magnetic particle collector and mix.
95. Aliquot 50 µl of resuspended beads into new tube/well for each capture.
96. Place the tubes on magnet to bind the beads. Allow the solution to clear.
97. Once clear, remove and discard the supernatant.
98. The Capture Beads are now ready to bind the captured DNA. Proceed immediately to the next step.

#### **Hybrid Capture, Bind DNA to capture beads**

99. Transfer one hybridization sample to a single prepared tube/well of Capture Beads from the previous step.
100. Mix thoroughly by vortexing for 10 seconds.

101. Bind the captured sample to the beads by placing the samples in a thermocycler set to 47°C for 15 minutes (heated lid set to 57°C).

#### **Hybrid Capture, Heated wash (47°C)**

102. Preheat 2 vials with 200 µl 1x stringent wash buffer at 47°C for use in step 79.
103. After the 15-minute incubation, remove the samples from the thermocycler.
104. Thermocycler should remain at 47°C (heated lid turned on and set to maintain 57°C) for following steps.
105. Add 100 µl of (RT) 1X Wash Buffer I to the 15 µl of Capture Beads plus bead-bound DNA.
106. Mix thoroughly by vortexing for 10 seconds.
107. Place the samples on a magnetic particle collector to capture the beads. Allow the solution to clear.
108. Once clear, remove and discard the supernatant.
109. Add 200 µl of 47°C 1X Stringent Wash Buffer to each sample.
110. Mix to homogeneity by vortexing for at least 10 seconds.
111. Place on thermocycler pre-heated to 47 °C, close lid (set to 57 °C) and incubate for 5 minutes.
112. After incubating 5 minutes, remove the sample from thermocycler and place on a magnet.
113. Allow the solution to clear.
114. Once clear, remove and discard the supernatant.
115. Repeat Steps 72-78 for a total of two washes using 1X Stringent Wash Buffer.

#### **Hybrid Capture, RT washes**

116. Add 200 µl of 1X Wash Buffer I.
117. Mix thoroughly by vortexing for 10 seconds. Ensure that the mixture is homogeneous.
118. Incubate at room temperature for 1 minute.
119. Place the samples on a magnet. Allow the solution to clear.
120. Once clear, remove and discard the supernatant.
121. Add 200 µl of 1X Wash Buffer II.
122. Mix thoroughly by vortexing for 10 seconds. Ensure that the mixture is homogeneous.
123. Incubate at room temperature for 1 minute.
124. Place the samples on a magnet. Allow the solution to clear.
125. Once clear, remove and discard the supernatant being careful not to disturb the beads.
126. Add 200 µl of 1X Wash Buffer III.
127. Mix thoroughly by vortexing for 10 seconds. Ensure that the mixture is homogeneous.
128. Incubate at room temperature for 1 minute.
129. Place the samples on a magnet. Allow the solution to clear.
130. Once clear, remove and discard the supernatant.
131. Place the samples on a magnet. Allow the solution to clear.
132. Once clear, remove and discard the supernatant.
133. Remove the samples from the magnetic particle collector.
134. Add 15 µl PCR-grade water to each tube/plate well of bead-bound DNA sample.
135. Store the beads plus captured samples at -15 to -25°C or proceed to Amplification.

#### **Hybrid Capture, Amplification**

136. Prepare a PCR master mix (per reaction) KAPA HiFi HotStart mix 25 µl and Library amplification Primer mix 5 µl.
137. Add the 30 µl PCR master mix to the 20 µl eluate from step 26
138. Run on a thermocycler: 1x (98°C 45 sec) **14x** (98°C 15 sec, 60°C 30 sec, 72°C 3 min 30 sec) 1x (72°C 1 min), hold at 4°C.
139. Add 90 µl Ampure XP beads to the 50 µl PCR mix (1.8x).
140. Incubate 5 minutes.
141. Wash 2 times, on magnet, with 200 µl 80% Ethanol.
142. Pipet as dry as possible.
143. Air dry for 5 minutes.

144. Elute in 53  $\mu$ l EB, transfer 50  $\mu$ l to a new tube.
145. Determine the DNA concentration with Qubit.

## Capture-NGS

### DNA isolation, library preparation and sequencing

DNA was extracted from 3-10 x 10  $\mu$ m FFPE sections using the QIAamp DNA FFPE Tissue Kit (Qiagen, Hilden, Germany) according to manufacturer's protocol. Peripheral blood DNA was extracted using the QIAamp Blood Mini Kit (Qiagen, Hilden, Germany) according to the manufacturer's spin protocol. Isolated DNA was quantified using a Qubit 2.0 Fluorometer using the QubitBR kit (Thermo Fisher Scientific, Carlsbad CA, USA) and 250-800 ng in a total volume of 130  $\mu$ l was fragmented with a Covaris S2 or ME220 (Covaris Inc, Woburn MA, USA) (**Suppl. Table 5**), for 6 minutes at 200 cycles per burst to an average size of 180-220 bp for the Covaris S2 and for 3 minutes at 1000 cycles per burst to an average size of 250-300 bp. DNA concentrations and the fragmentation profile/size distribution were determined with a 2100 bioanalyzer using the Agilent DNA 1000 kit (Agilent Technologies, Santa Clara, CA). 250 ng of 180-220 or 250-300 bp fragmented DNA was used to create NGS libraries with the KAPA library preparation kit (KAPA Biosystems, Wilmington MA, USA). In short, the DNA ends were repaired (20°C for 30 minutes) and single A-tails were ligated (30°C for 30 minutes). Subsequently, uniquely indexed adapters (Roche NimbleGen, Madison WI, USA; IDT, Coralville IA, USA) were ligated overnight (16°C) after which size selection was performed to retain fragments between 250-450 bp. DNA was amplified for seven polymerase chain reaction (PCR) cycles. An aliquot of the created DNA libraries was subjected to targeted capture. A capture panel was designed with NimbleGen design software (Roche). The capture panel covers exons of ~350 genes (~1.5 Mb) for mutation analysis and multiple chromosomal regions (including genes, introns and intergenic regions; ~1.5 Mb) for translocation analysis (Roche order ID 0200204534, ID 43712, and ID 1000002633) (**Suppl. Table 6**). Capture was performed according to NimbleGen EZ SeqCap library protocol V5.1 (Roche NimbleGen, Madison WI, USA). Per capture, DNA of eight libraries were equimolarly pooled together in one tube to a total of 1  $\mu$ g DNA. Probe hybridization was performed overnight at 47°C. Pools were amplified for 14 PCR cycles. Three pools were equimolar pooled and loaded together on one sequence lane and sequenced 125 bp or 150 bp paired-end on a HiSeq 2500 or 4000 respectively (**Suppl. Table 5**) (Illumina, San Diego CA, USA).

### Alignment of sequence reads

NGS reads were de-multiplexed with Bcl2fastq (Illumina). Adapters and poor quality bases were trimmed with SeqPurge (-min len 20 ; v0.1-104) . Reads were aligned against the human reference genome (hg19) with BWA mem (-M -R ; v0.7.12) <sup>1</sup>. Read realignment with ABRA (v0.96)<sup>2</sup> was used to improve alignment accuracy. The aligned BAM files were sorted on query name with Sambamba (v0.5.6), and duplicate reads were flagged with Picard tools MarkDuplicates (v2.4.1), using the setting ASSUME\_SORT\_ORDER=queryname. This setting is required to mark duplicate secondary alignments in addition to duplicate primary alignments. <sup>3,4</sup>. Next, reads were sorted by coordinate (Sambamba) for compatibility with the rest of the data analysis pipeline.

### Structural variant analysis

The part of the pipeline for structural variant analysis, including translocations, inversions, deletions, insertions and duplications, was created in the workflow management system Snakemake <sup>5</sup>. To obtain high sensitivity and specificity 4 translocation detection algorithms were combined: BreakMer (v.0.0.4)<sup>6</sup>, GRIDSS (v.1.4.2)<sup>7</sup>, NovoBreak (v.1.1.3)<sup>8</sup> and Wham (v.1.7.0)<sup>9</sup>. These were selected based upon the following criteria. 1. Possibility to detect translocations 2. Functionality with paired end Illumina sequencing data of short insert size. 3. Usable on targeted sequencing data 4. Documentation

available 5. Maintained until at least 2017. Breakmer, GRIDSS and NovoBreak were executed with default settings. Wham was executed with mapping quality of 10 (-p) and base quality of 5 (-q). For compatibility with Breakmer, chromosome-prefixes were removed from the BAM file. Breakmer requires a target bed file containing the regions of interest for translocation detection, to reduce assembly time and to obtain higher accuracy, the translocation targets were divided in regions of 5 kb in the target BED file.

To be able to combine the output of these tools, the output was converted in R (v.3.4.1) to be comparable between tools, and gene annotation was added. To remove noise, filters were applied. In subsequent order the following SVs were removed from the data:

1. SVs with both breakpoints off-target, further than 300 bp outside the capture probe location.
2. Duplicate SVs with exactly the same breakpoints detected with the same tool.
3. SVs not meeting set thresholds for the tool. For Breakmer, at least 4 split reads and 3 discordant reads, for Wham at least 8 reads (sum of discordant and split reads), for GRIDSS a quality score above 450 and for NovoBreak an average coverage of at least 4 high mapping quality translocation reads.
4. SV output of the four tools were combined and SVs detected by only one tool were removed. Hence, only SVs recognized by at least 2 tools were included. Therefore, breakpoints that lie within a 10 bp margin were considered to be the same SV.

### Blacklist

Examination of the results showed multiple often recurrent SVs. Visual inspection of these events in the integrative genome viewer (IGV) taught us that those SVs were artifacts of different origins. Part of the artifactual SVs were a consequence of highly repetitive regions in the genome, others were introduced by partly homologous regions. Furthermore, some common germline SVs, especially small indels, were detected in the data. To remove those problematic regions from the output, a blacklist was created based on a set of 25 non-tumor samples, (12 blood samples, 4 FFPE hyperplasia lymph node, 6 FFPE reactive lymph node and 3 FFPE epithelial tissues). For these 25 samples SV detection was performed following the exact same DNA, isolation, preparation, capture and NGS procedures as well as the four selected detection tools with the same settings. Common breakpoint locations detected in at least 2 non-tumor samples within a margin of 10 bp were added to the blacklist using Bedtools multi-inter (v0.2.17). Blacklisted areas less than 50 bp apart were merged to one region with Bedtools merge. SVs with one of the breakpoints within the blacklisted regions were removed from the SV detection output. Remaining SVs were manually inspected in IGV (**Supplementary Data 4**).

### References

1. Li, H. Aligning sequence reads, clone sequences and assembly contigs with BWA-MEM. *arXiv preprint arXiv:1303.3997* (2013).
2. Mose, L.E., Wilkerson, M.D., Neil Hayes, D., Perou, C.M. & Parker, J.S. ABRA: Improved coding indel detection via assembly-based realignment. *Bioinformatics* **30**, 2813-2815 (2014).
3. Tarasov, A., Vilella, A.J., Cuppen, E., Nijman, I.J. & Prins, P. Sambamba: Fast processing of NGS alignment formats. *Bioinformatics* **31**, 2032-2034 (2015).
4. Broad Institute Picard Tools. *GitHub repository*: <http://broadinstitute.github.io/picard/> (2018).
5. Köster, J. & Rahmann, S. Snakemake-a scalable bioinformatics workflow engine. *Bioinformatics* **28**, 2520-2522 (2012).
6. Abo, R.P. et al. Breakmer: detection of structural variation in targeted massively parallel sequencing data using kmers. *Nucleic Acids Research* **43**, e19-e19 (2015).
7. Cameron, D.L. et al. GRIDSS: sensitive and specific genomic rearrangement detection using positional de Bruijn graph assembly. *Genome research* **27**, 2050-2060 (2017).

8. Chong, Z. et al. novoBreak: local assembly for breakpoint detection in cancer genomes. *Nature methods* **14**, 6-11 (2017).
9. Kronenberg, Z.N. et al. Wham: Identifying Structural Variants of Biological Consequence. *PLOS Computational Biology* **11**, e1004572-e1004572 (2015).

# Structure of FFPE-TLC reads

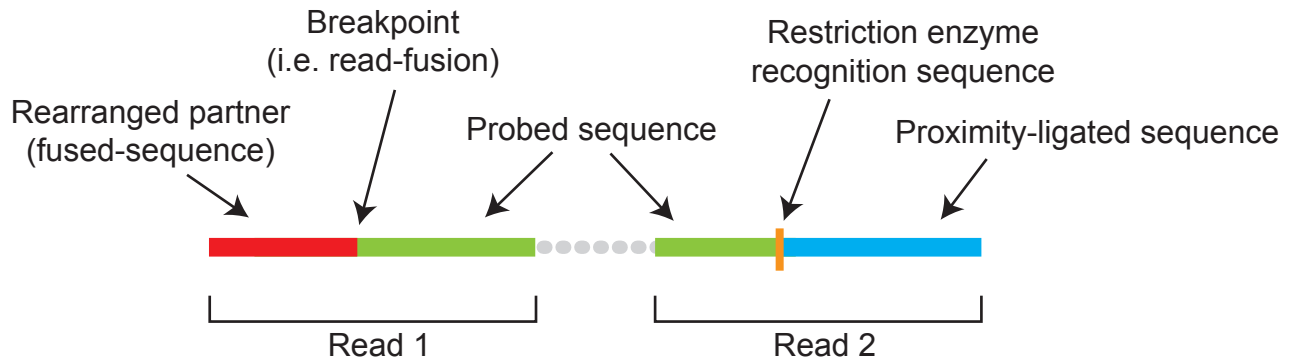

## Suppl. Figure 1. Schematic view of read structure in FFPE-TLC samples

FFPE-TLC samples were Illumina sequenced in paired-end mode. Probed fragments (shown in light green) may be represented on one read-end only, or on both reads-ends. Apart from such fragments, proximity-ligation fragments (shown in blue) can be present. Such fragments are recognizable through a restriction site recognition sequence (shown as a vertical line in orange) that links them to the probed fragments. Proximity-ligation fragments may originate from the surroundings of the probed area, or from the neighborhood of the rearranged partner if a rearrangement is present either inside the probed area or in its vicinity. If a rearrangement is present, FFPE-TLC reads can also carry fragments that are produced through fusion of probed (or proximity-ligation) fragments to sequences from the rearranged partner (shown in red). Such reads can depict the rearrangement event in base pair resolution and therefore provide even further detail about the occurred structural variant.



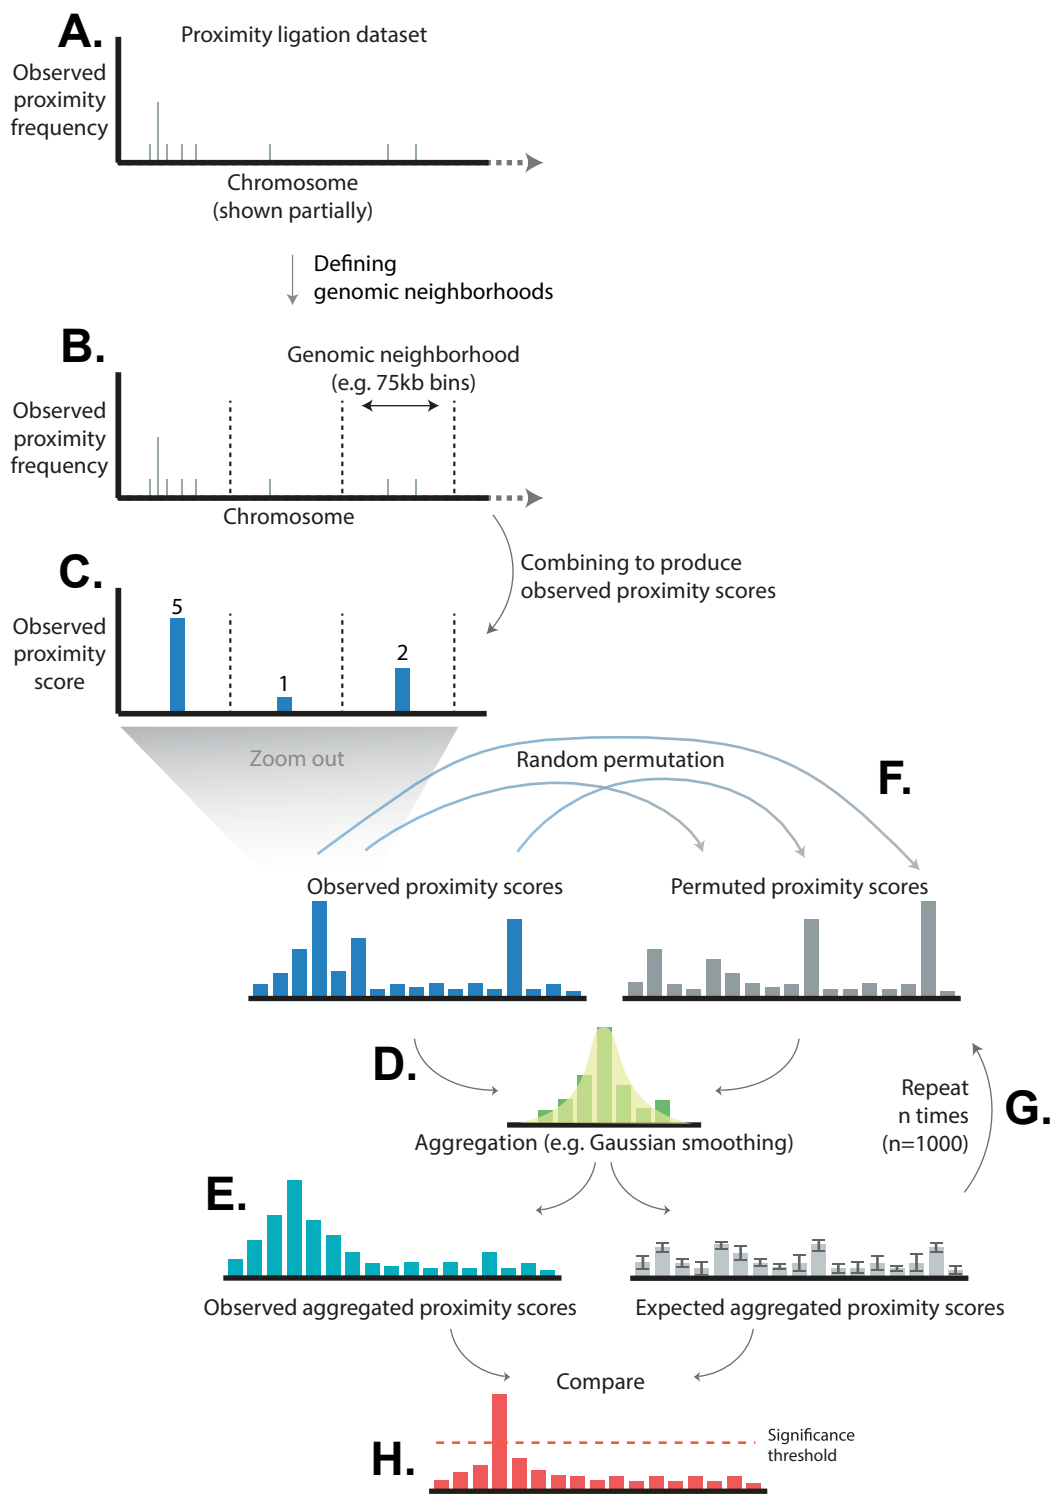

## Suppl. Figure 2. Schematic view of read structure in FFPE-TLC samples

A. In a given FFPE-TLC dataset that contains mapped fragments (i.e., proximity-ligation products), B. PLIER initially splits the reference genome into equally spaced genomic intervals. C. PLIER then calculates for every interval a “proximity frequency” that is defined by the number of segments within that genomic interval that are covered by at least a fragment (or a proximity-ligation product). D. By Gaussian smoothing of proximity frequencies across each chromosome, E. observed “proximity scores” are calculated to remove very local and abrupt increase (or decrease) in proximity frequencies that are most likely spurious. F. By in silico shuffling of observed proximity frequencies across the genome followed by a Gaussian smoothing across each chromosome, G. an expected (or average) proximity score and a corresponding standard deviation (shown schematically by error bars) are estimated for genomic intervals with similar properties (e.g., genomic intervals present on trans chromosomes). H. Finally, a z-score is calculated for every genomic interval using its observed proximity score and the related expected proximity scores and standard deviation thereof. Taken together, PLIER objectively searches for genomic intervals with significantly increased concentrations of captured fragments and considers them as prime candidates for rearrangements. Please note that this figure is merely a schematic of how PLIER functions, and the depicted coverage or statistical values do not represent real data.

# A. MYC > IGH

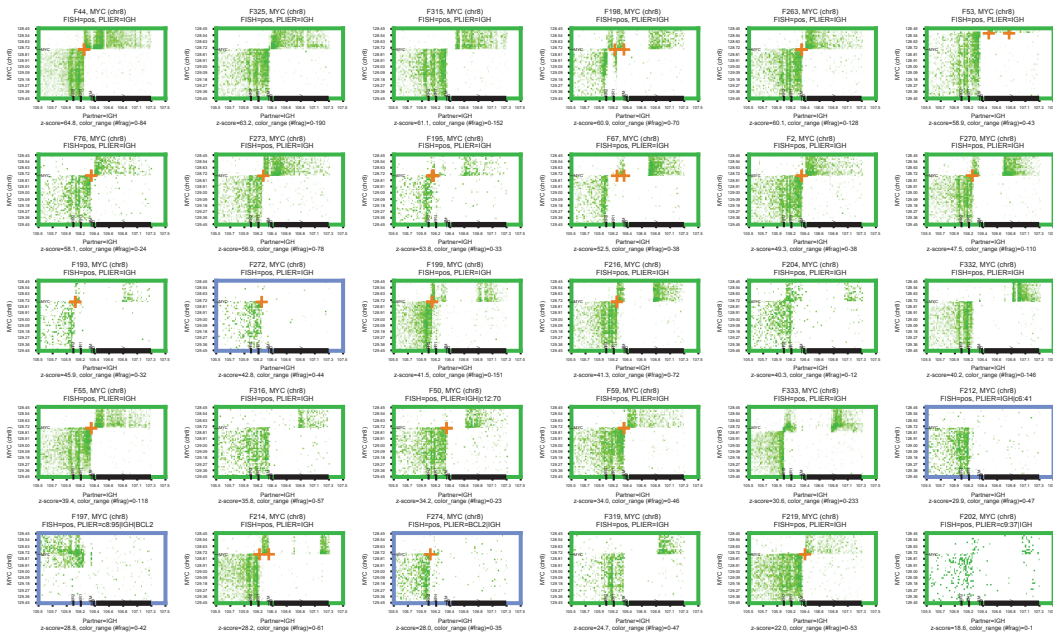

# B. MYC > Rest

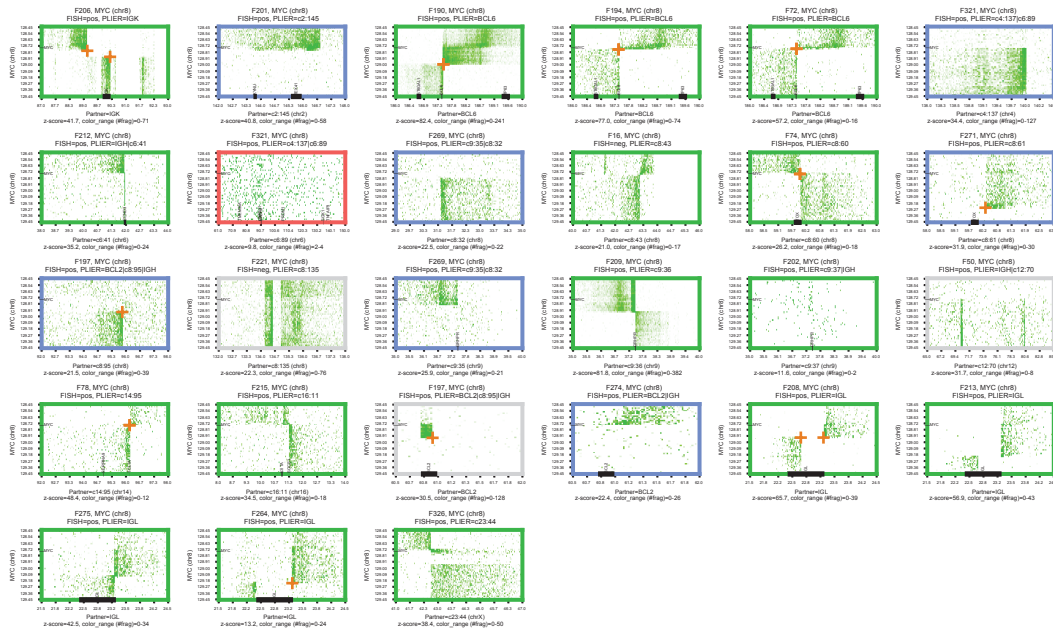

# C. Replicate samples

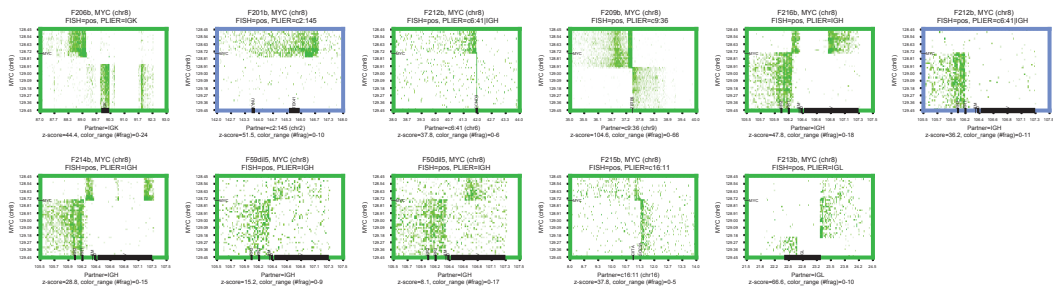

## Suppl. Figure 3. Butterfly plots of rearrangements found by PLIER in MYC

Each butterfly plot is a heatmap in which the partner area is depicted on the x-axis and the probed area on the y-axis. Both axes are split into 20kb equally-spaced bins. Each element (i.e., dot) in the heatmap shows the number of reads that link the corresponding bin in the probed area to the corresponding bin in the partner area. Black boxes across axes indicate the extent of each gene. On the top of each plot patient identifier, the probed gene as well as chromosome of origin are mentioned. Underneath each plot the identified partner area, PLIER's estimated enrichment score ("z-score") and finally the minimum and maximum coverage values ("color\_range") that are considered to color the heatmap from white to green are mentioned. The box around each butterfly plot indicates the type of rearrangement: reciprocal rearrangement shown in green, non-reciprocal rearrangement shown in blue, reciprocity-undetermined rearrangement shown in gray or otherwise not relevant shown in red. This classification was assigned by visually inspecting each butterfly plot to establish whether a transition of coverage (i.e., breakpoint) can be seen across the vertical axis (i.e., probed area) of the plot A. Rearrangements found from MYC to IGH across samples in our study. B. Rearrangements found between the MYC gene and any other genes across samples in our study. C. Rearrangements found in the MYC gene to any partners that are found in the replicated samples in our study.

## A. BCL2 > IGH

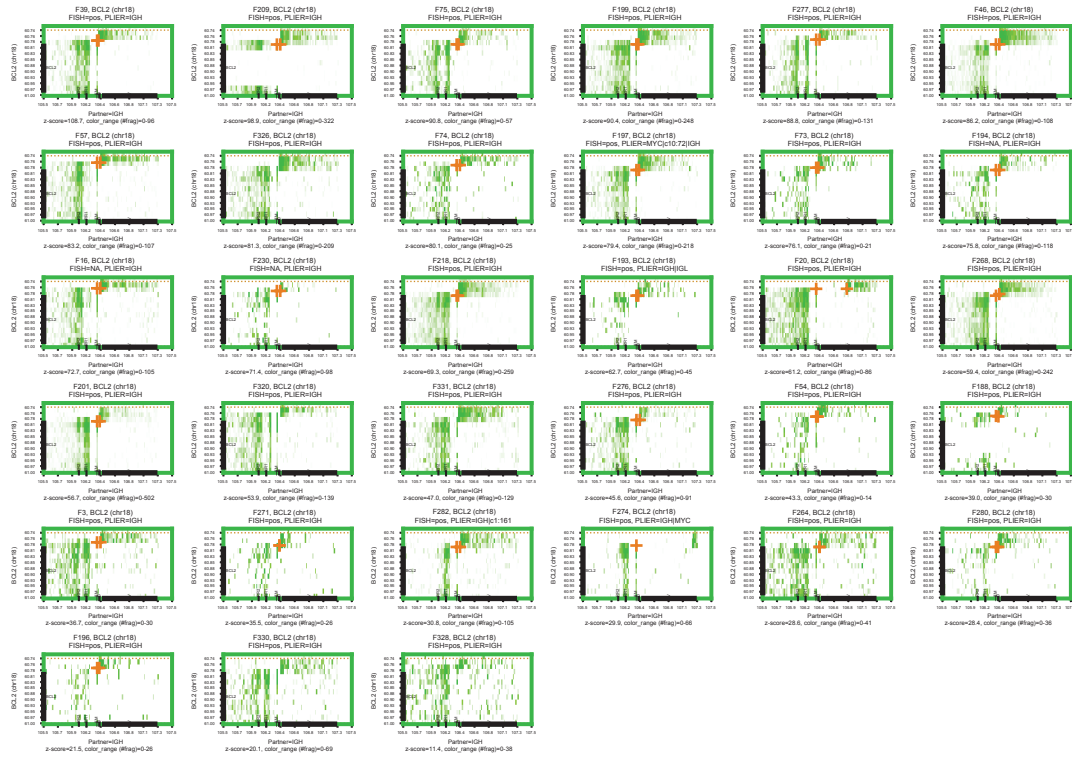

## B. BCL2 > Rest

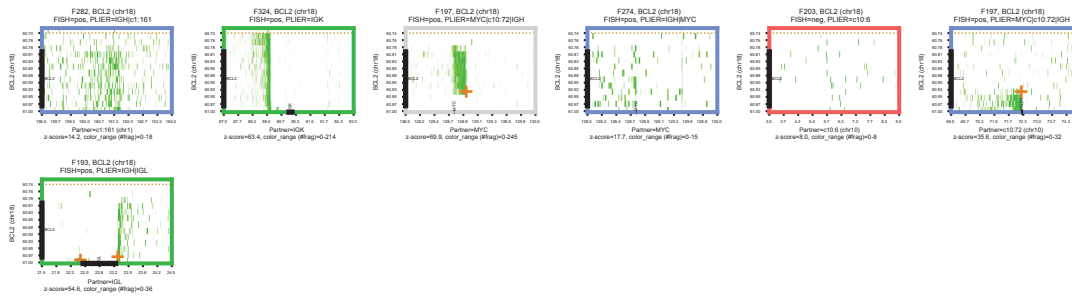

## C. Replicate samples

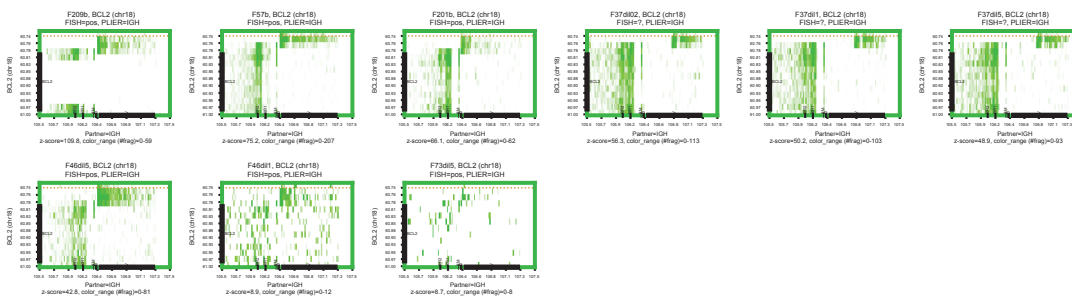

### Suppl. Figure 4. Butterfly plots of rearrangements found by PLIER in BCL2

Each butterfly plot is a heatmap in which the partner area is depicted on the x-axis and the probed area on the y-axis. Both axes are split into 20kb equally-spaced bins. Each element (i.e., dot) in the heatmap shows the number of reads that link the corresponding bin in the probed area to the corresponding bin in the partner area. Black boxes across axes indicate the extent of each gene. On the top of each plot patient identifier, the probed gene as well as chromosome of origin are mentioned. Underneath each plot the identified partner area, PLIER's estimated enrichment score ("z-score") and finally the minimum and maximum coverage values ("color\_range") that are considered to color the heatmap from white to green are mentioned. The box around each butterfly plot indicates the type of rearrangement: reciprocal rearrangement shown in green, non-reciprocal rearrangement shown in blue, reciprocity-undetermined rearrangement shown in gray or otherwise not relevant shown in red. This classification was assigned by visually inspecting each butterfly plot to establish whether a transition of coverage (i.e., breakpoint) can be seen across the vertical axis (i.e., probed area) of the plot. A. Rearrangements found from BCL2 to IGH across samples in our study. B. Rearrangements found between the BCL2 gene and any other genes across samples in our study. C. Rearrangements found in the BCL2 gene to any partners that are found in the replicated samples in our study.

# A. BCL6 > IGH

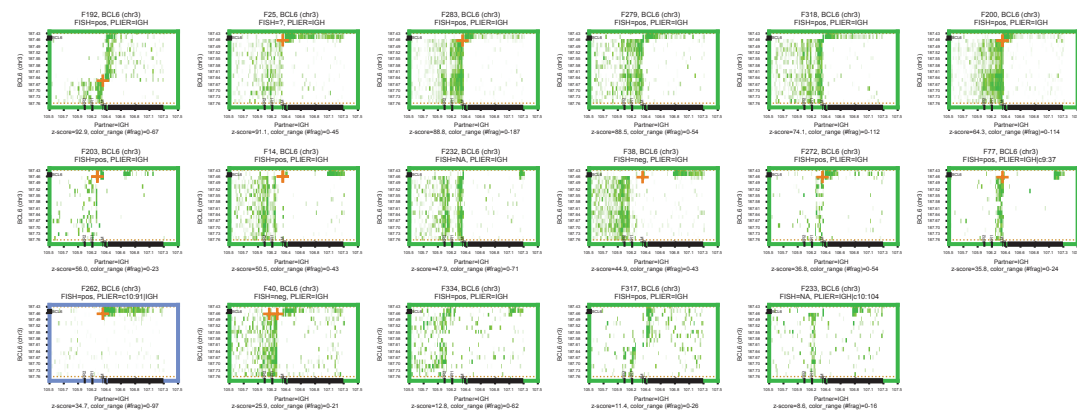

# B. BCL6 > Rest

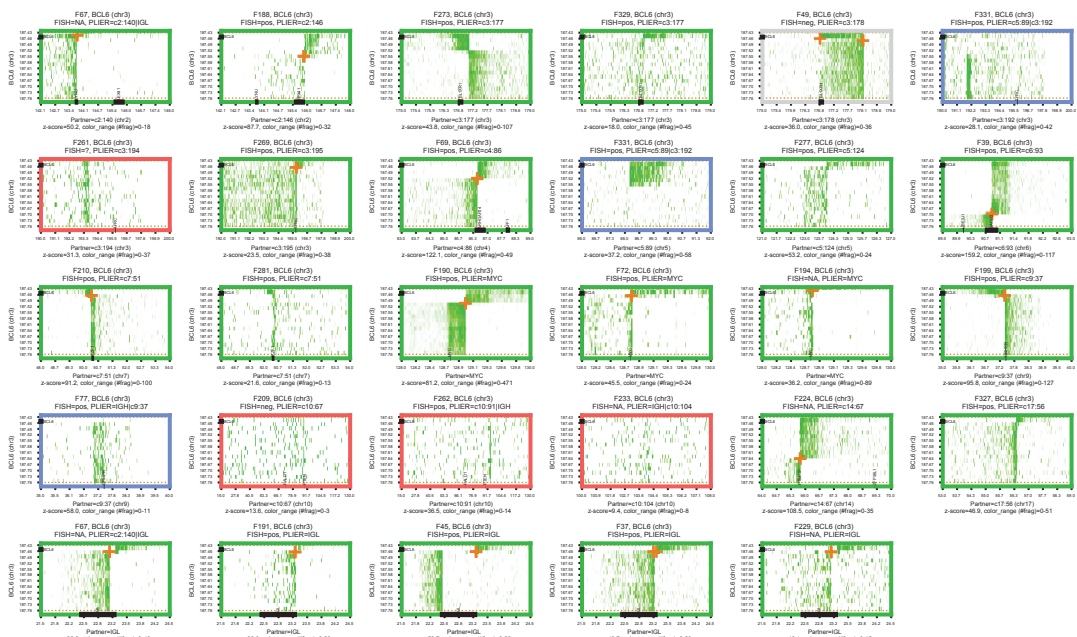

# C. Replicate samples

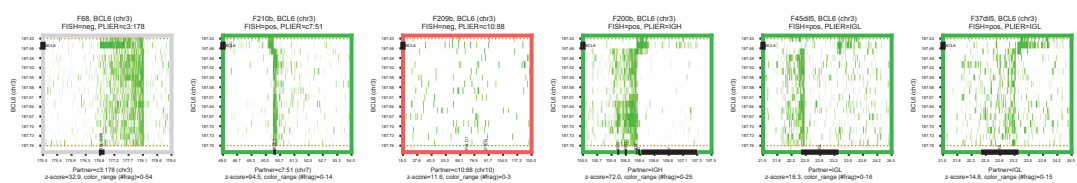

## Suppl. Figure 5. Butterfly plots of rearrangements found by PLIER in BCL6

Each butterfly plot is a heatmap in which the partner area is depicted on the x-axis and the probed (target) area on the y-axis. Both axes are split into 20 kb equally-spaced bins. Each element (i.e., dot) in the heatmap shows the number of reads that link the corresponding bin in the probed area to the corresponding bin in the partner area. Black boxes across axes indicate the extent of each gene. On the top of each plot patient identifier, the probed gene as well as chromosome of origin are mentioned. Underneath each plot the identified partner area, PLIER's estimated enrichment score ("z-score") and finally the minimum and maximum coverage values ("color\_range") that are considered to color the heatmap from white to green are mentioned. The box around each butterfly plot indicates the type of rearrangement: reciprocal rearrangement shown in green, non-reciprocal rearrangement shown in blue, reciprocity-undetermined rearrangement shown in gray or otherwise not relevant shown in red. This classification was assigned by visually inspecting each butterfly plots to establish whether a transition of coverage (i.e., breakpoint) can be seen across the vertical axis (i.e., probed area) of the plot. Rearrangements found from BCL6 to IGH across samples in our study. B. Rearrangements found between BCL6 and any other genes across samples in our study. C. Rearrangements found in the BCL6 gene to any partners that are found in the replicated samples in our study.

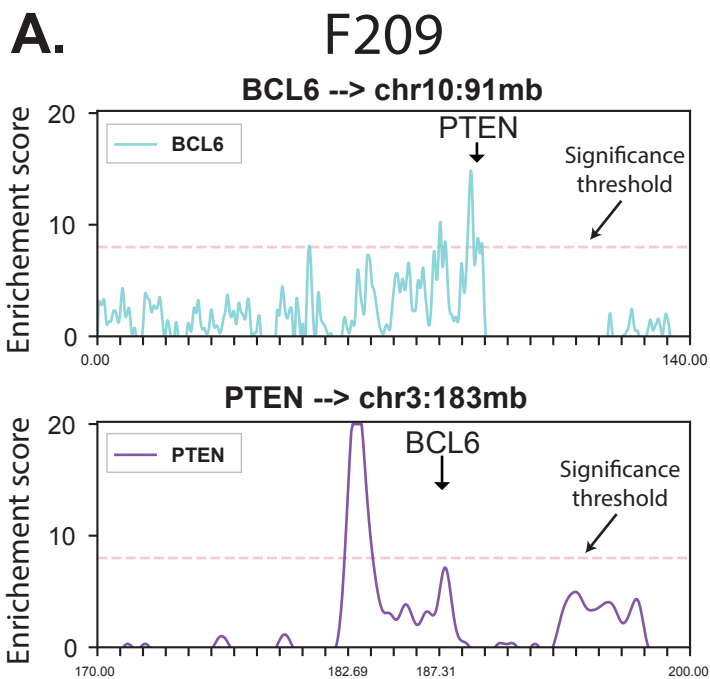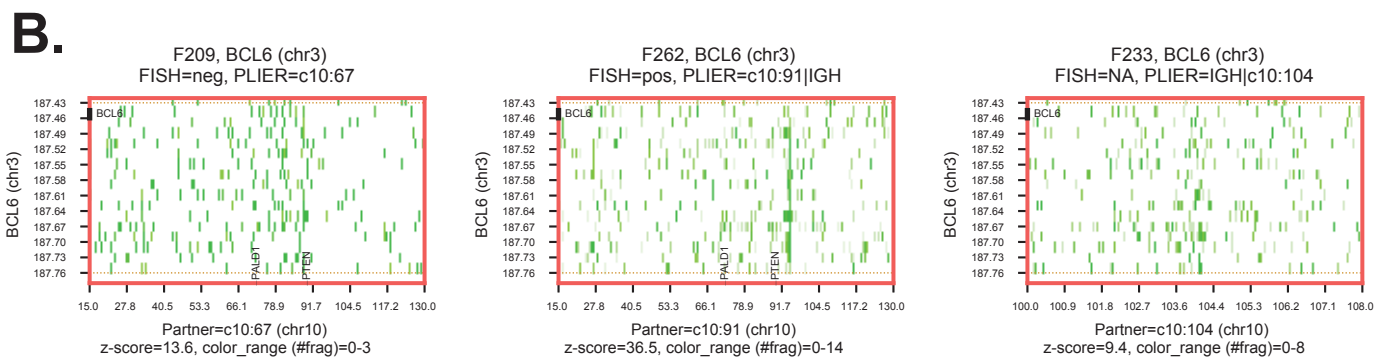

**Suppl. Figure 6. Example of PLIER calls that are later identified as not relevant using butterfly plots.**

A. In sample F209 when looking from BCL6, PLIER identified a significant increase of enrichment score around chr10:91mb near the PTEN gene (top plot). However, when looking from PTEN, no reciprocal peak at BCL6 was seen, but ~4.5 Mb away from BCL6. This observation confirms that the rearrangement did not occur within the region of interest (BCL6 in this case). B. The existence of not relevant cases can be further validated in a butterfly visualization of the same case (i.e., F209 looking from BCL6) that is depicted in the left most butterfly plot. As shown, no transition (or breakpoint) of coverage can be seen. Instead, a vertical pattern of coverage is visible. We observed two more cases with similar characteristics. One case was seen in F262 when looking from BCL6 and was very similar to the already described case in F209. The other case was in F233 and also looking from BCL6, but this time the increased vertical coverage was seen around chr10:104. All three cases were therefore considered as not relevant calls of PLIER.

# BCL2

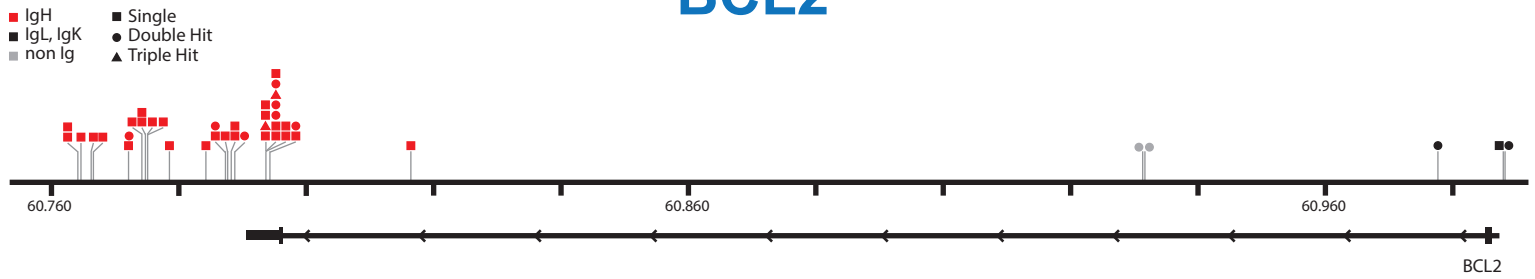

# BCL6

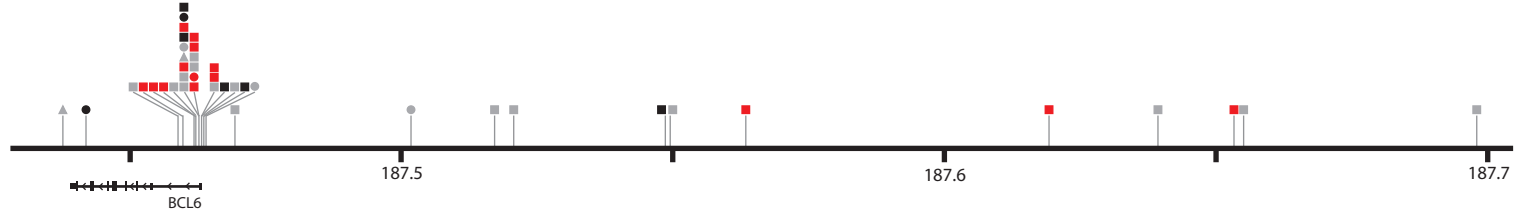

# IGH

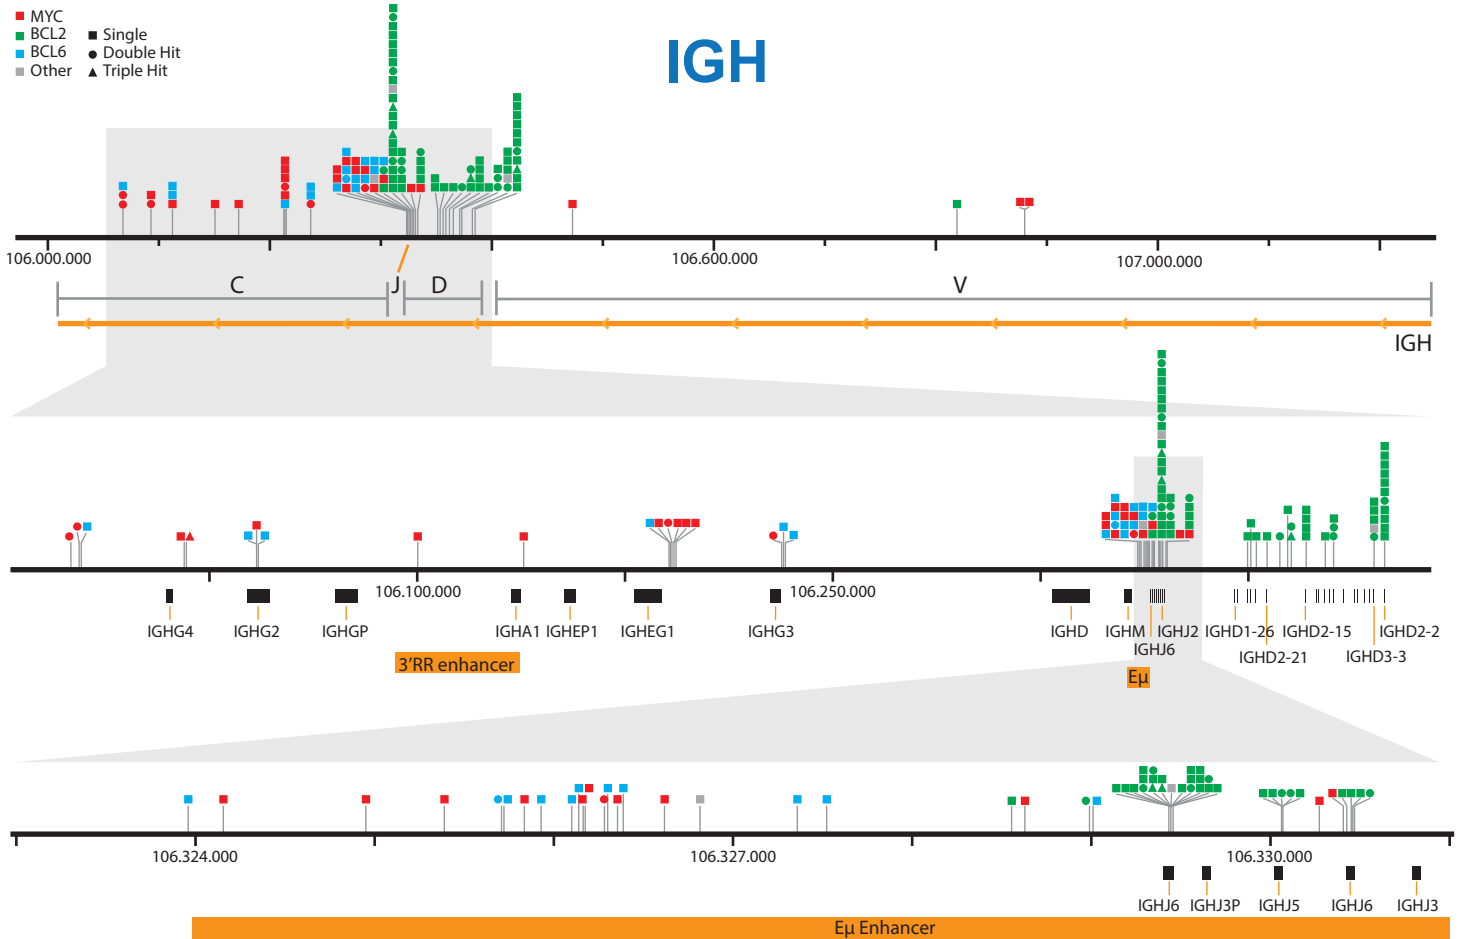

## Suppl. Figure 7. Overview of breakpoints found in BCL2, BCL6 and IGH using captured fusion-reads in FFPE-TLC.

Fusion-reads in FFPE-TLC can map the occurred breakpoints of rearrangements at base pair resolution. This plot visualizes the identified breakpoints seen from BCL2, BCL6 and IGH MYC? locus, across all samples in our study.

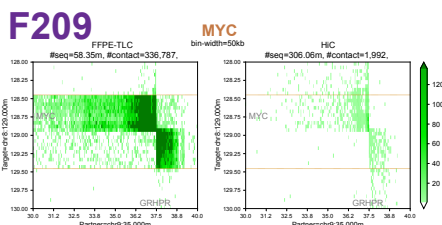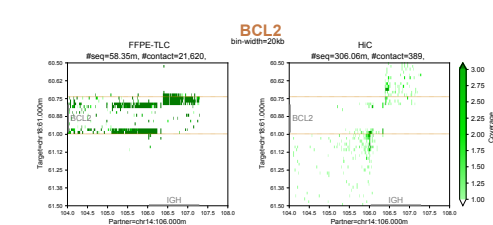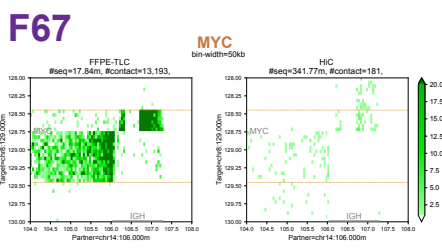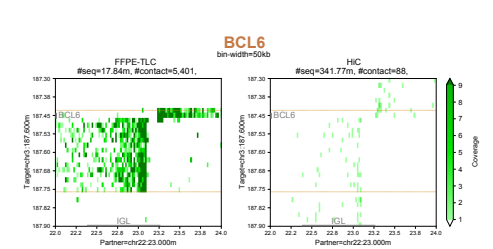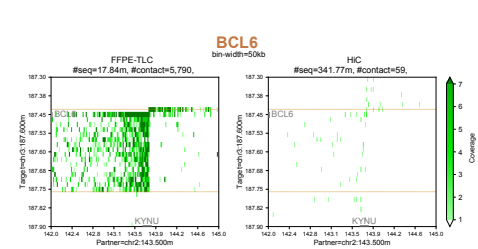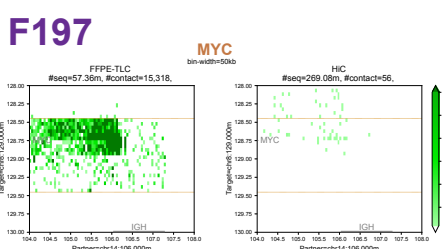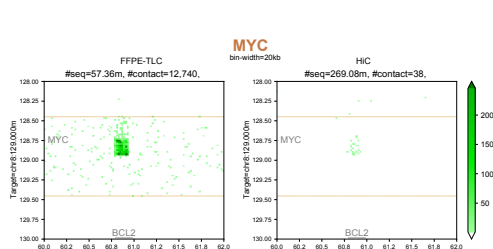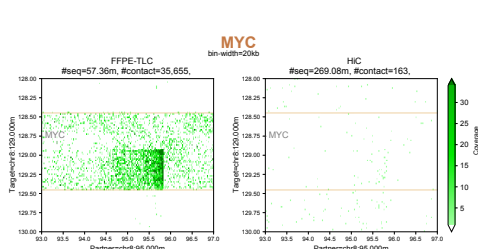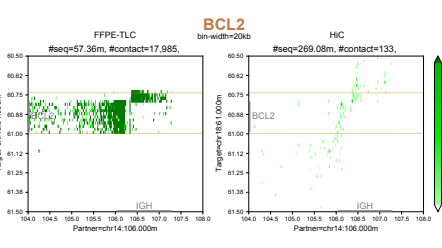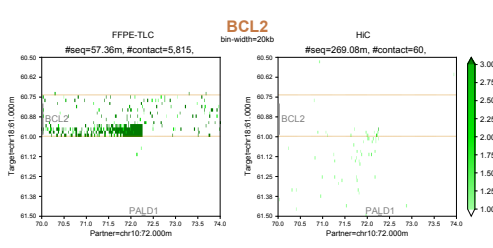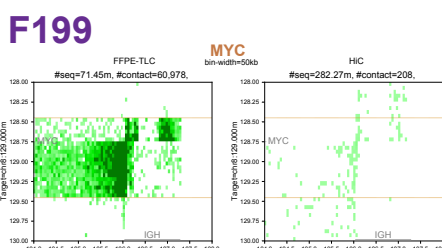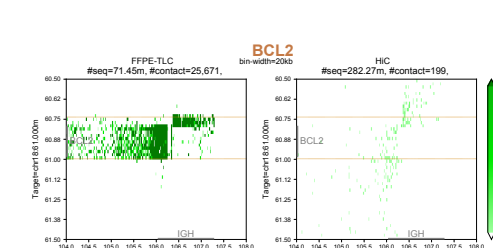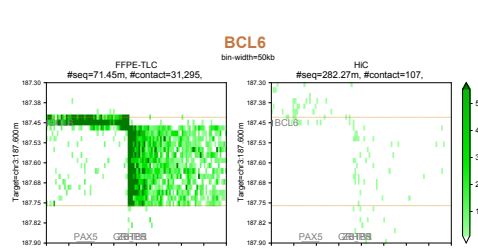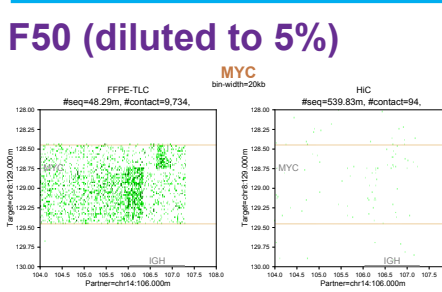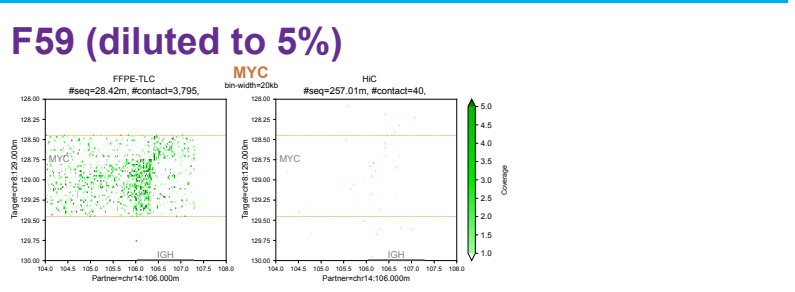

**Suppl. Figure 8. Performance comparison between FFPE-TLC and Hi-C.**  
 FFPE-TLC outperforms Hi-C in detecting every rearrangement identified across six selected samples even though the sequencing depth of the Hi-C experiment is multiple times more than the corresponding FFPE-TLC experiment. Butterfly visualization of breakpoints in six selected samples that are identified by FFPE-TLC and Hi-C. In each experiment, the material is collected from the same sample and FFPE-TLC and Hi-C are performed. In each pair of butterfly plots, the left plot is FFPE-TLC and the right plot is Hi-C. The target gene is shown in brown on the top, the bin-width used to visualize the butterfly plot is shown underneath. Each butterfly plot also includes the sequencing depth of each experiment (#seq) and the number of ligation-product that could be captured by each experiment within the visualized interval (#contact).

Comparison of PLIER's enrichment scores for IG\* vs. non-IG\* rearrangement partners

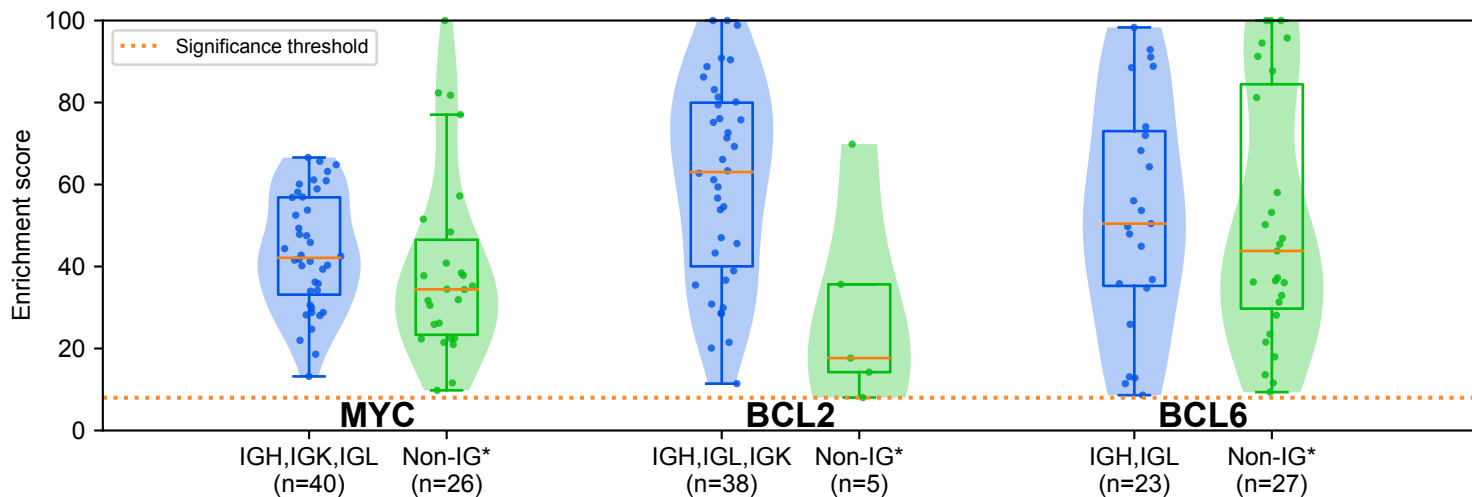

**Suppl. Figure 9. Enrichment score of IG\* rearranged partners vs. non-IG\* rearranged partners.**

IG\* rearranged partners are generally showing higher enrichment scores. Each boxplot (or the violin plot underneath) refers to the distribution of enrichment scores identified for a particular category of partners: IG\* partners are shown in blue and non-IG\* partners are shown in green. Each box extends from the lower (Q1) to upper quartile (Q3) values of the depicted data, with a line drawn at the median. Number of partners in each category is shown underneath each label (n=X) and also shown by dots "." that are overlaid on the boxplot. In addition, the lower whisker in each box plot depicts the  $Q1 - 1.5 * IQR$  position of the corresponding data distribution, where IQR is defined as the interquartile range ( $Q3 - Q1$ ). Similarly, the upper whisker depicts the  $Q3 + 1.5 * IQR$  position of the corresponding data distribution. The significance threshold (enrichment score > 8.0) is shown by a red dashed line.



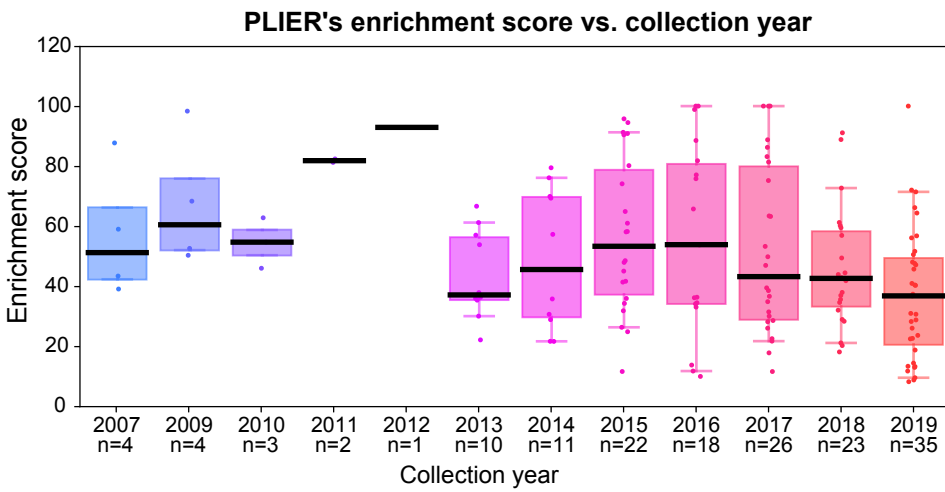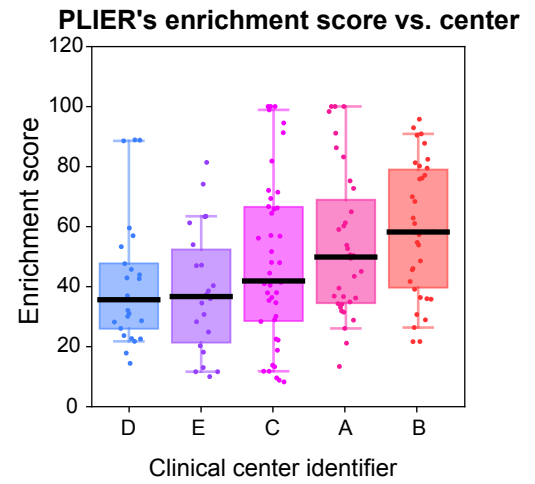

**Suppl. Figure 10. PLIER's enrichment scores compared to clinical variables.**

In this plot, the left panel indicates the distribution of enrichment scores of samples collected in a certain year (x-axis). The number of samples collected in each year is mentioned underneath each x-tick (i.e., n=X). The right panel indicates the distribution of enrichment score across clinical centers that contributed samples to our study. X-ticks refers to the center's identifier (see Suppl. Table 2 for center identifiers). Each box of a given boxplot extends from the lower (Q1) to upper quartile (Q3) values of the depicted data, with a line drawn at the median in black. In addition, the lower whisker in each box plot depicts the  $Q1 - 1.5 * IQR$  position of the corresponding data distribution, where IQR is defined as the interquartile range ( $Q3 - Q1$ ). Similarly, the upper whisker depicts the  $Q3 + 1.5 * IQR$  position of the corresponding data distribution.

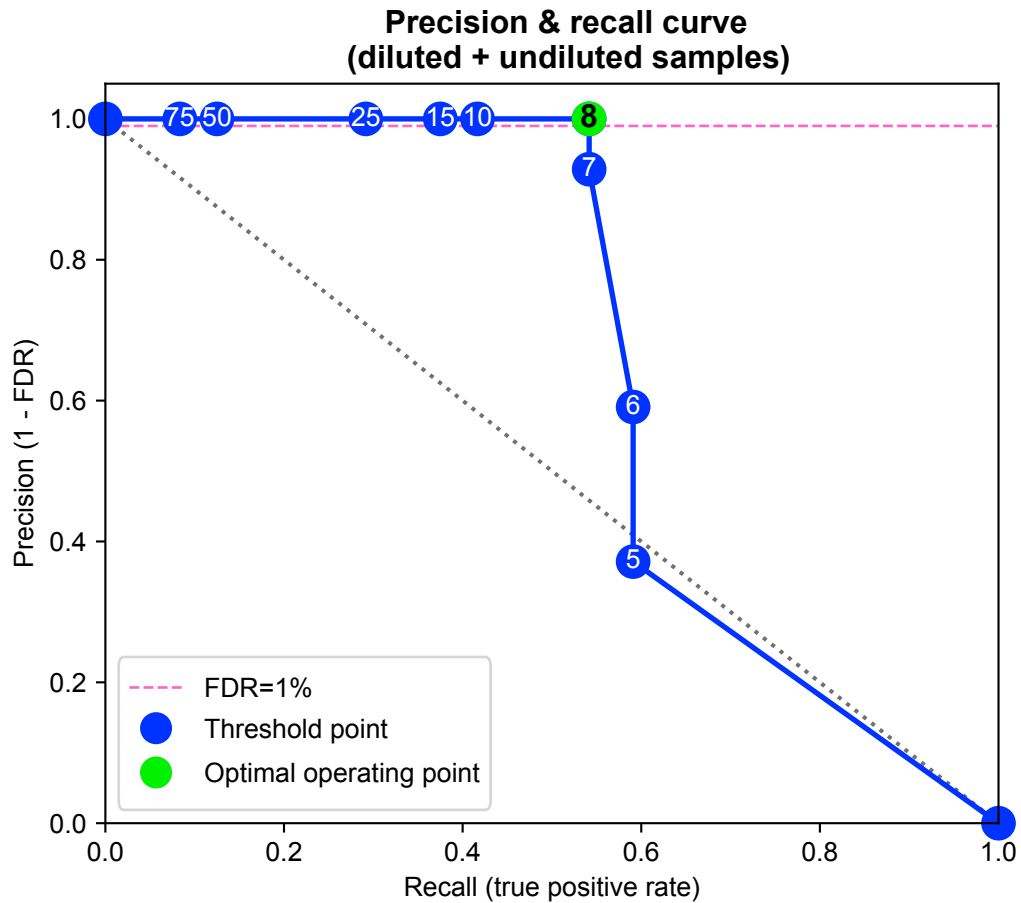

**Suppl. Figure 11. Receiver operative curve of PLIER calls across different significance threshold.**

With FDR below 1%, the threshold of 8.0 is chosen as an optimal point to determine significance. In this plot, the x-axis indicates the recall and the y-axis refers to the precision of PLIER calls made for a certain significance threshold (the threshold is shown within the circles in the plot). Thresholds with minor change of precision and recall are not shown. For this analysis, we included all dilution samples with their undiluted counterparts. The sample/target genes for which no FISH data was available were excluded from this analysis.

Suppl. Table 1. 4C Primers used to produce 4C experiments in this study.

| Name              | Sequence                                            | Chr | Loc       | Gene     |
|-------------------|-----------------------------------------------------|-----|-----------|----------|
| BCL2_60920438_Fw  | TACACGACGCTCTCCGATCTGTAAGTGGCAGCTACACCAT            | 18  | 60920438  |          |
| BCL2_60920438_Rv  | ACTGGAGTTCAGACGTGTGCTCTCCGATCTAGTCCATACTGCTCACACCT  |     |           |          |
| BCL2_60880740_Fw  | TACACGACGCTCTCCGATCTAGGAGTTAAACGAGAACC              | 18  | 60880740  |          |
| BCL2_60880740_Rv  | ACTGGAGTTCAGACGTGTGCTCTCCGATCTGTGTGAGGACCTACATTGGT  |     |           |          |
| BCL2_25kbDS_Fw    | TACACGACGCTCTCCGATCTCTTTGGATAACCTGTTGCAT            | 18  | 60779113  |          |
| BCL2_25kbDS_Rv    | ACTGGAGTTCAGACGTGTGCTCTCCGATCTAAGTCAGATGGAATCCAACC  |     |           |          |
| BCL2_50kbDS_Fw    | TACACGACGCTCTCCGATCTCGTCCATCAGCTGTCTAAG             | 18  | 60746416  |          |
| BCL2_50kbDS_Rv    | ACTGGAGTTCAGACGTGTGCTCTCCGATCTTACATCCAGTTTGGCATAACA |     |           |          |
| BCL6_10kbDS_Fw    | TACACGACGCTCTCCGATCTGGACCAGTAGGAACCCTTAA            | 3   | 187432447 |          |
| BCL6_10kbDS_Rv    | ACTGGAGTTCAGACGTGTGCTCTCCGATCTAGTTGGTCTCTATGGCTTT   |     |           |          |
| BCL6_150kbUS_Fw   | TACACGACGCTCTCCGATCTGTCAATTTAGGGAACAGC              | 3   | 187614849 |          |
| BCL6_150kbUS_Rv   | ACTGGAGTTCAGACGTGTGCTCTCCGATCTCCAGCGACTCTGATTAAG    |     |           |          |
| BCL6_15kbUS_Fw    | TACACGACGCTCTCCGATCTAGCAGAGTCCGGACATTT              | 3   | 187474752 |          |
| BCL6_15kbUS_Rv    | ACTGGAGTTCAGACGTGTGCTCTCCGATCTTATTGGAATGACGGATAACC  |     |           |          |
| BCL6_Fw           | TACACGACGCTCTCCGATCTAACTCAAACCCCAAGCAATG            | 3   | 187450285 |          |
| BCL6_Rv           | ACTGGAGTTCAGACGTGTGCTCTCCGATCTTAGTTACTGCAAAGGGGCTA  |     |           |          |
| BCL6_290kbUS_Fw   | TACACGACGCTCTCCGATCTCATTGCGATTTGGATAC               | 3   | 187759922 |          |
| BCL6_290kbUS_Rv   | ACTGGAGTTCAGACGTGTGCTCTCCGATCTTAAAATTTGAAGGCCTTTCA  |     |           |          |
| MYC_128830560_Fw  | TACACGACGCTCTCCGATCTGGTTCATCAGCAGGATTTAT            | 8   | 128830560 |          |
| MYC_128830560_Rv  | ACTGGAGTTCAGACGTGTGCTCTCCGATCTAAGTCTAAAATGGGAAGCCT  |     |           |          |
| MYC_128773166_Fw  | TACACGACGCTCTCCGATCTTTGTTCAAAAAGTGGGAGC             | 8   | 128773166 |          |
| MYC_128773166_Rv  | ACTGGAGTTCAGACGTGTGCTCTCCGATCTCCCAATCTACTACGTCAG    |     |           |          |
| MYC_100kbDS_Fw    | TACACGACGCTCTCCGATCTCTAGGCTGCAGTCTGAAT              | 8   | 128851246 |          |
| MYC_100kbDS_Rv    | ACTGGAGTTCAGACGTGTGCTCTCCGATCTCACCCATATAATAAAGGCG   |     |           |          |
| MYC_200kbUS_Fw    | TACACGACGCTCTCCGATCTATAACAATGCTCAGATGCTT            | 8   | 128562344 |          |
| MYC_200kbUS_Rv    | ACTGGAGTTCAGACGTGTGCTCTCCGATCTAAAGCCAACATTTAGCTTC   |     |           |          |
| MYC_20kbUS_Fw     | TACACGACGCTCTCCGATCTCACCTCAATCCTGTTCAG              | 8   | 128735995 |          |
| MYC_20kbUS_Rv     | ACTGGAGTTCAGACGTGTGCTCTCCGATCTAAGAATGGTGTCTTGGATTA  |     |           |          |
| IgH_106441535_Fw  | TACACGACGCTCTCCGATCTCAGTCCAATGTTAGCATCA             | 14  | 106441342 |          |
| IgH_106441535_Rv  | ACTGGAGTTCAGACGTGTGCTCTCCGATCTGTAGGTTCTGAGCATCCCTT  |     |           |          |
| IgH_Eu_Fw         | TACACGACGCTCTCCGATCTACAGTATAACAGGCAGCAC             | 14  | 106320062 |          |
| IgH_Eu_Rv         | ACTGGAGTTCAGACGTGTGCTCTCCGATCTGTGCACTCAGGACCAGTATC  |     |           |          |
| IgH_RR1_Fw        | TACACGACGCTCTCCGATCTGAGGTTCTCCCAATTTGCTC            | 14  | 106166687 |          |
| IgH_RR1_Rv        | ACTGGAGTTCAGACGTGTGCTCTCCGATCTACTCTGAGCCTCCAGGAAAC  |     |           |          |
| IgK_3E_Fw2        | TACACGACGCTCTCCGATCTGTAAGAAGTGGAGATTGGC             | 2   | 89130252  |          |
| IgK_3E_Rv2        | ACTGGAGTTCAGACGTGTGCTCTCCGATCTAACACCTTCGTGCATAAATT  |     |           |          |
| IgK_89131583_Fw   | TACACGACGCTCTCCGATCTAGGCTCTTACCAGGACTCAT            | 2   | 89131488  |          |
| IgK_89131583_Rv   | ACTGGAGTTCAGACGTGTGCTCTCCGATCTGAGCTAGCTGACAGGATGAC  |     |           |          |
| IgL_23284838_Fw   | TACACGACGCTCTCCGATCTTAGTGTGAGCAAGCTTCA              | 22  | 23284711  |          |
| IgL_23284838_Rv   | ACTGGAGTTCAGACGTGTGCTCTCCGATCTGAGGCTATAGGAAGATTGCC  |     |           |          |
| IgL_23403654_Fw   | TACACGACGCTCTCCGATCTCAAGGGTTGATTAGTTTGC             | 22  | 23403826  |          |
| IgL_23403654_Rv   | ACTGGAGTTCAGACGTGTGCTCTCCGATCTGTACAGAAAGCTCATCACGG  |     |           |          |
| chr3_176795170_Fw | TACACGACGCTCTCCGATCTTCTCAAGTGTGATGCTGGT             |     |           | TBL1XR1  |
| chr3_176795170_Rv | ACTGGAGTTCAGACGTGTGCTCTCCGATCTTTTTCTCAAGGACTCCAT    |     |           | TBL1XR1  |
| chr3_176800784_Fw | TACACGACGCTCTCCGATCTTCAAAAACCTGTTCAAAAT             |     |           | TBL1XR1  |
| chr3_176800784_Rv | ACTGGAGTTCAGACGTGTGCTCTCCGATCTTATAGCAGATTGGATTGATT  |     |           | TBL1XR1  |
| chr3_176699284_Fw | TACACGACGCTCTCCGATCTAAATACAGCCTATGCCTTCC            |     |           | TBL1XR1  |
| chr3_176699284_Rv | ACTGGAGTTCAGACGTGTGCTCTCCGATCTTGATGAGGAAGTGGGTAATC  |     |           | TBL1XR1  |
| chr4_86570997_Fw  | TACACGACGCTCTCCGATCTTTCCAATATACGGTGTAAATTT          |     |           | ARHGAP24 |
| chr4_86570997_Rv  | ACTGGAGTTCAGACGTGTGCTCTCCGATCTGGCATTATGAAGCCTAATGA  |     |           | ARHGAP24 |

Suppl. Table 2. Comparison FFPE-4C and FFPE-TLC results. Rearrangements shown in bold indicate that an additional 4C experiment is performed and confirmed the rearrangement reciprocally.

| Sample   | type    | MYC_4C                | BCL2_4C         | BCL6_4C              | MYC_TLC                                 | BCL2_TLC        | BCL6_TLC                   |
|----------|---------|-----------------------|-----------------|----------------------|-----------------------------------------|-----------------|----------------------------|
| F044 (A) | case    | <b>IGH-MYC</b>        |                 |                      | <b>MYC-IGH</b>                          |                 |                            |
| F050 (A) | case    | <b>IGH-MYC</b>        |                 |                      | <b>MYC-IGH</b><br><b>MYC-chr12:70mb</b> |                 |                            |
| F053 (A) | case    | <b>IGH-MYC</b>        |                 |                      | <b>MYC-IGH</b>                          |                 |                            |
| F055 (A) | case    | <b>IGH-MYC</b>        |                 |                      | <b>MYC-IGH</b>                          |                 |                            |
| F059 (A) | case    | <b>IGH-MYC</b>        |                 |                      | <b>MYC-IGH</b>                          |                 |                            |
| F067 (A) | case    | <b>IGH-MYC</b>        |                 |                      | <b>MYC-IGH</b>                          |                 | <b>BCL6-IGL, BCL6-KYNU</b> |
| F016 (A) | case    | <b>MYC-chr8:138mb</b> | <b>IGH-BCL2</b> |                      | <b>MYC-chr8:43mb</b>                    | <b>BCL2-IGH</b> |                            |
| F057 (A) | case    |                       | <b>IGH-BCL2</b> |                      |                                         | <b>BCL2-IGH</b> |                            |
| F020 (A) | case    |                       | <b>IGH-BCL2</b> |                      |                                         | <b>BCL2-IGH</b> |                            |
| F046 (A) | case    |                       | <b>IGH-BCL2</b> |                      |                                         | <b>BCL2-IGH</b> |                            |
| F039 (A) | case    |                       | <b>IGH-BCL2</b> | <b>BCL6-BACH2</b>    |                                         | <b>BCL2-IGH</b> | <b>BCL6-BACH2</b>          |
| F014 (A) | case    |                       |                 | <b>IGH-BCL6</b>      |                                         |                 | <b>BCL6-IGH</b>            |
| F069 (A) | case    |                       |                 | <b>BCL6-ARHGAP24</b> |                                         |                 | <b>BCL6-ARHGAP24</b>       |
| F037 (A) | case    |                       |                 | <b>BCL6-IGL</b>      |                                         |                 | <b>BCL6-IGL</b>            |
| F049 (A) | case    |                       |                 | <b>BCL6-TBL1XR1</b>  |                                         |                 | <b>BCL6-TBL1XR1</b>        |
| F025 (A) | case    |                       |                 | <b>IGH-BCL6</b>      |                                         |                 | <b>BCL6-IGH</b>            |
| F038 (A) | case    |                       |                 | <b>IGH-BCL6</b>      |                                         |                 | <b>BCL6-IGH</b>            |
| F040 (A) | case    |                       |                 | <b>IGH-BCL6</b>      |                                         |                 | <b>BCL6-IGH</b>            |
| F045 (A) | case    |                       |                 | <b>IGL-BCL6</b>      |                                         |                 | <b>BCL6-IGL</b>            |
| F036 (A) | case    |                       |                 |                      |                                         |                 |                            |
| F054 (A) | case    |                       |                 |                      |                                         | <b>BCL2-IGH</b> |                            |
| F001 (A) | case    |                       |                 |                      |                                         |                 |                            |
| F015 (A) | case    |                       |                 |                      |                                         |                 |                            |
| F021 (A) | case    |                       |                 |                      |                                         |                 |                            |
| F023 (A) | case    |                       |                 |                      |                                         |                 |                            |
| F024 (A) | case    |                       |                 |                      |                                         |                 |                            |
| F041 (A) | case    |                       |                 |                      |                                         |                 |                            |
| F042 (A) | case    |                       |                 |                      |                                         |                 |                            |
| F043 (A) | case    |                       |                 |                      |                                         |                 |                            |
| F052 (A) | case    |                       |                 |                      |                                         |                 |                            |
| F056 (A) | case    |                       |                 |                      |                                         |                 |                            |
| F058 (A) | case    |                       |                 |                      |                                         |                 |                            |
| F005 (A) | control |                       |                 |                      |                                         |                 |                            |
| F006 (A) | control |                       |                 |                      |                                         |                 |                            |
| F007 (A) | control |                       |                 |                      |                                         |                 |                            |
| F009 (A) | control |                       |                 |                      |                                         |                 |                            |
| F010 (A) | control |                       |                 |                      |                                         |                 |                            |
| F011 (A) | control |                       |                 |                      |                                         |                 |                            |
| F012 (A) | control |                       |                 |                      |                                         |                 |                            |
| F013 (A) | control |                       |                 |                      |                                         |                 |                            |
| F017 (A) | control |                       |                 |                      |                                         |                 |                            |
| F018 (A) | control |                       |                 |                      |                                         |                 |                            |
| F019 (A) | control |                       |                 |                      |                                         |                 |                            |
| F022 (A) | control |                       |                 |                      |                                         |                 |                            |
| F026 (A) | control |                       |                 |                      |                                         |                 |                            |
| F027 (A) | control |                       |                 |                      |                                         |                 |                            |
| F029 (A) | control |                       |                 |                      |                                         |                 |                            |

Suppl. Table 3. Result of dilutions coverage vs. enrichment score experiment.

| Sample     | Gene | Dilution  | #False positives |             | PLIER | z-score (SV) |
|------------|------|-----------|------------------|-------------|-------|--------------|
|            |      |           | Coverage         | Enrichement |       |              |
| <b>F46</b> | BCL2 | 0.2%      | 161              | 0           | x     | 2.5          |
| <b>F73</b> | BCL2 | 0.2%      | 260              | 0           | x     | 1.0          |
| <b>F37</b> | BCL6 | 0.2%      | 339              | 0           | x     | 2.2          |
| <b>F45</b> | BCL6 | 0.2%      | 87               | 0           | x     | 2.1          |
| <b>F50</b> | MYC  | 0.2%      | 196              | 0           | x     | 1.4          |
| <b>F59</b> | MYC  | 0.2%      | 83               | 0           | x     | 3.1          |
| <b>F46</b> | BCL2 | 1%        | 3                | 0           | found | 9.0          |
| <b>F73</b> | BCL2 | 1%        | 343              | 0           | x     | 1.4          |
| <b>F37</b> | BCL6 | 1%        | 19               | 0           | x     | 3.5          |
| <b>F45</b> | BCL6 | 1%        | 14               | 0           | x     | 3.4          |
| <b>F50</b> | MYC  | 1%        | 38               | 0           | x     | 2.1          |
| <b>F59</b> | MYC  | 1%        | 17               | 0           | x     | 3.9          |
| <b>F46</b> | BCL2 | 5%        | 0                | 0           | found | 44.1         |
| <b>F73</b> | BCL2 | 5%        | 13               | 0           | found | 8.8          |
| <b>F37</b> | BCL6 | 5%        | 1                | 0           | found | 15.1         |
| <b>F45</b> | BCL6 | 5%        | 0                | 0           | found | 16.7         |
| <b>F50</b> | MYC  | 5%        | 8                | 0           | found | 8.2          |
| <b>F59</b> | MYC  | 5%        | 2                | 0           | found | 15.5         |
| <b>F46</b> | BCL2 | undiluted | 0                | 0           | found | 101.8        |
| <b>F73</b> | BCL2 | undiluted | 0                | 0           | found | 82.7         |
| <b>F37</b> | BCL6 | undiluted | 0                | 0           | found | 52.1         |
| <b>F45</b> | BCL6 | undiluted | 0                | 0           | found | 60.9         |
| <b>F50</b> | MYC  | undiluted | 0                | 0           | found | 41.6         |
| <b>F59</b> | MYC  | undiluted | 0                | 0           | found | 96.4         |

**Suppl. Table 4.** List of patents that are related to this work.

| Patent applicant                  | Inventors                                    | Application #  | Status      | Aspect of manuscript covered                             |
|-----------------------------------|----------------------------------------------|----------------|-------------|----------------------------------------------------------|
| Hubrecht Institute-KNAW/Cergentis | Max van Min, Wouter de Laat                  | EP2591125A2    | Granted     | TLA, target enrichment of proximity ligated molecules    |
| Hubrecht Institute-KNAW           | Amin Allahyar, Wouter de Laat, Erik Splinter | P6091185EP     | Application | PLIER peak calling                                       |
| Cergentis                         | Joost Swennenhuis, Erik Splinter             | P2010494.9     | Application | FFPE-TLC reverse crosslinking step                       |
| Cergentis                         | Mehmet Yilmaz, Erik Splinter                 | P2010492.3     | Application | FFPE-TLC tissue permeabilization step                    |
| ErasmusMC                         | Frank Grosveld, Wouter de Laat               | WO/2008/084405 | Granted     | 4C, Target enrichment of proximity ligated DNA molecules |
| ErasmusMC                         | Frank Grosveld, Wouter de Laat               | WO/2007/004057 | Granted     | 4C experiments                                           |

Suppl. Table 5. Samples analyzed with Capture-NGS

| Sample number  | Covaris | Covaris Input (ng)         | Capture panel | HiSeq       | insertsize (bp) |
|----------------|---------|----------------------------|---------------|-------------|-----------------|
| F72_Sample 1   | S2      | 690                        | V2            | 2500        | 125             |
| F73_Sample 2   | S2      | 497                        | V2            | 2500        | 125             |
| F74_Sample 3   | S2      | 321                        | V1            | 2500        | 125             |
| F75_Sample 4   | ME220   | 250                        | V2            | 4000        | 150             |
| F76_Sample 5   | S2      | 510                        | V1            | 2500        | 125             |
| F77_Sample 6   | S2      | Unknown (15ul DNA isolate) | V2            | 2500        | 125             |
| F78_Sample 7   | S2      | 282                        | V1            | 2500        | 125             |
| F188_Sample 8  | S2      | 419                        | V2            | 2500        | 125             |
| F189_Sample 9  | S2      | Unknown (15ul DNA isolate) | V2            | 2500        | 125             |
| F190_Sample 10 | ME220   | 250                        | V2 & V3       | 2500 & 4000 | 150             |
| F191_Sample 11 | S2      | 250                        | V2            | 2500        | 125             |
| F192_Sample 12 | S2      | 570                        | V2            | 2500        | 125             |
| F193_Sample 13 | S2      | 336                        | V2            | 2500        | 125             |
| F194_Sample 14 | S2      | Unknown (15ul DNA isolate) | V2            | 2500        | 125             |
| F195_Sample 15 | S2      | 600                        | V1            | 2500        | 125             |
| F196_Sample 16 | S2      | 250                        | V1            | 2500        | 125             |
| F197_Sample 17 | S2      | Unknown (15ul DNA isolate) | V2            | 2500        | 125             |
| F198_Sample 18 | S2      | Unknown (15ul DNA isolate) | V2            | 2500        | 125             |
| F199_Sample 19 | S2      | Unknown (15ul DNA isolate) | V2            | 2500        | 125             |

Suppl. Table 6. Capture-NGS probe details

| V1         | Order ID   | 187705000  |          |           |
|------------|------------|------------|----------|-----------|
| Chrom      | Start      | Stop       | Gene     | Area size |
| 2          | 89157133   | 89184926   | IGK      | 27793     |
| 3          | 176738541  | 176782810  | TBL1XR1  | 44269     |
| 3          | 187439164  | 187463513  | BCL6     | 24349     |
| 3          | 189349294  | 189612301  | TP63     | 263007    |
| 7          | 13935480   | 14028687   | ETV1     | 93207     |
| 8          | 128746035  | 128761810  | MYC      | 15775     |
| 9          | 5450499    | 5510803    | CD274    | 60304     |
| 9          | 5510804    | 5571282    | PDCD1LG2 | 60478     |
| 9          | 36838530   | 37034476   | PAX5     | 195946    |
| 11         | 69455872   | 69469242   | CCND1    | 13370     |
| 12         | 11802787   | 12048325   | ETV6     | 245538    |
| 14         | 106032614  | 107288051  | IGH      | 1255437   |
| 16         | 10878740   | 11017182   | CIITA    | 138442    |
| 18         | 60760000   | 60987282   | BCL2     | 227282    |
| 22         | 23,229,960 | 23,238,013 | IGLL5    | 8053      |
| 22         | 23238014   | 23264766   | IGL      | 26752     |
| 22         | 23522551   | 23660224   | BCR      | 137673    |
| 22         | 23,915,500 | 23,922,400 | IGLL1    | 6900      |
| total size |            |            |          | 2,844,575 |

| V2         | Order ID  | 43712     |          |           |
|------------|-----------|-----------|----------|-----------|
| Chrom      | Start     | Stop      | Gene     | Area size |
| 2          | 89156500  | 89162000  | IGK      | 5500      |
| 3          | 176738000 | 176783000 | TBL1XR1  | 45000     |
| 3          | 187439000 | 187475000 | BCL6     | 36000     |
| 3          | 187705000 | 187750000 | BCL6     | 45000     |
| 3          | 189455000 | 189527000 | TP63     | 72000     |
| 8          | 128446000 | 128905000 | MYC      | 459000    |
| 8          | 129103000 | 129404000 | MYC      | 301000    |
| 9          | 5450000   | 5471000   | CD274    | 21000     |
| 9          | 5503000   | 5572000   | PDCD1LG2 | 69000     |
| 9          | 37020000  | 37036000  | PAX5     | 16000     |
| 14         | 106050000 | 106400000 | IGH      | 350000    |
| 16         | 10970000  | 10975000  | CIITA    | 5000      |
| 16         | 10992500  | 10996000  | CIITA    | 3500      |
| 18         | 60760000  | 60797000  | BCL2     | 37000     |
| 18         | 60984000  | 60996600  | BCL2     | 12600     |
| 22         | 23235000  | 23265000  | IGL      | 30000     |
| total size |           |           |          | 1,507,600 |

| V3         | Order ID  | 1000002633 |                |           |
|------------|-----------|------------|----------------|-----------|
| Chrom      | Start     | Stop       | Gene           | Area size |
| 2          | 89156500  | 89165500   | IGK            | 9000      |
| 3          | 176738000 | 176915000  | TBL1XR1        | 177000    |
| 3          | 187455000 | 187475000  | BCL6           | 20000     |
| 3          | 187660000 | 187750000  | BCL6           | 90000     |
| 3          | 189455000 | 189527000  | TP63           | 72000     |
| 8          | 128510000 | 129220000  | MYC            | 710000    |
| 9          | 5450000   | 5471000    | CD274          | 21000     |
| 9          | 5471000   | 5503000    | CD274-PDCD1LG2 | 32000     |
| 9          | 5503000   | 5572000    | PDCD1LG2       | 69000     |
| 9          | 37020000  | 37036000   | PAX5           | 16000     |
| 14         | 106053000 | 106058000  | IGH            | 5000      |
| 14         | 106064000 | 106074000  | IGH            | 10000     |
| 14         | 106089000 | 106100000  | IGH            | 11000     |
| 14         | 106108000 | 106118000  | IGH            | 10000     |
| 14         | 106173000 | 106180000  | IGH            | 7000      |
| 14         | 106200000 | 106220000  | IGH            | 20000     |
| 14         | 106232000 | 106243000  | IGH            | 11000     |
| 14         | 106298000 | 106400000  | IGH            | 102000    |
| 16         | 10970000  | 10975000   | CIITA          | 5000      |
| 16         | 10992500  | 10996000   | CIITA          | 3500      |
| 18         | 60760000  | 60797000   | BCL2           | 37000     |
| 18         | 60984000  | 60996600   | BCL2           | 12600     |
| 22         | 23235000  | 23265000   | IGL            | 30000     |
| total size |           |            |                | 1,480,100 |
